# Supplementary material
Source: MDPI journal article supplement (https://www.mdpi.com/2813-9372/1/1/4)
Supplement: s1 [file s1]

Archive with 1 entries (1 files):
- pets-2934433-supplementary.pdf
