# Supplementary material
Source: MDPI journal article supplement (https://www.mdpi.com/2813-9372/1/1/4)
Supplement: s1 [file s1 › pets-2934433-supplementary.pdf]

|                                                                                                                                                                    |                                                                                                                                                                                                                                                                                                                                                                                                                                                                                                                                                                                                                                                                                                                                                                                                                                                                                     |
|--------------------------------------------------------------------------------------------------------------------------------------------------------------------|-------------------------------------------------------------------------------------------------------------------------------------------------------------------------------------------------------------------------------------------------------------------------------------------------------------------------------------------------------------------------------------------------------------------------------------------------------------------------------------------------------------------------------------------------------------------------------------------------------------------------------------------------------------------------------------------------------------------------------------------------------------------------------------------------------------------------------------------------------------------------------------|
| 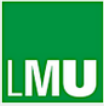 <p>LUDWIG-<br/>MAXIMILIANS-<br/>UNIVERSITÄT<br/>MÜNCHEN</p> <p>0% ausgefüllt</p> | <p>Liebe Studienteilnehmer*innen,</p> <p>herzlich willkommen zu der Online-Umfrage „Ursachen für Abbrüche der „Bone and raw foods“ Fütterung“, welche im Rahmen meiner Doktorarbeit im Studienfach der Tiermedizin stattfindet. Ziel unserer Studie ist es, die Ursachen eines Futterwechsels von BARF auf eine andere Art der Fütterung besser zu verstehen.</p> <p>Vielen Dank, dass Sie uns mit der vollständigen Beantwortung unserer Umfrage bei diesem Ziel unterstützen.</p> <p>Falls Sie mehrere Hunde haben und bei mehr als einem mit der BARF Fütterung aufgehört haben, entscheiden Sie sich bitte für einen Ihrer Hunde als Umfragegrundlage.</p> <p>Die Umfrage enthält 35 Fragen und umfasst einen Bearbeitungszeitaufwand von ca. 10 – 20 Minuten.</p> <p style="text-align: right;"><a href="#">Weiter</a></p> <p style="text-align: right;">Lilly Baum – 2021</p> |
|--------------------------------------------------------------------------------------------------------------------------------------------------------------------|-------------------------------------------------------------------------------------------------------------------------------------------------------------------------------------------------------------------------------------------------------------------------------------------------------------------------------------------------------------------------------------------------------------------------------------------------------------------------------------------------------------------------------------------------------------------------------------------------------------------------------------------------------------------------------------------------------------------------------------------------------------------------------------------------------------------------------------------------------------------------------------|

### English translation:

Dear study participants,

Welcome to the online survey "Causes for discontinuation of BARF (bone and raw foods) feeding", which is part of my doctoral thesis in veterinary medicine.

The aim of the study is to better understand the causes of a change of diet from BARF to another type of feeding.

Thank you for supporting this goal by completing the survey. If you have any questions or comments, please contact us at [barfstudie2021@web.de](mailto:barfstudie2021@web.de)

If you have several dogs and have stopped feeding BARF to more than one, please choose one of your dogs as the basis for the survey.

The survey contains 40 questions and takes about 15 minutes to complete.

|                                                                                                                                                                      |                                                                                                                                                                                                                                                                                                                                                                                                                                                                                                                                                                                                                                                                                                                                                                                                                                                                                                                                                                                                                                                                                                                                                                        |
|----------------------------------------------------------------------------------------------------------------------------------------------------------------------|------------------------------------------------------------------------------------------------------------------------------------------------------------------------------------------------------------------------------------------------------------------------------------------------------------------------------------------------------------------------------------------------------------------------------------------------------------------------------------------------------------------------------------------------------------------------------------------------------------------------------------------------------------------------------------------------------------------------------------------------------------------------------------------------------------------------------------------------------------------------------------------------------------------------------------------------------------------------------------------------------------------------------------------------------------------------------------------------------------------------------------------------------------------------|
| 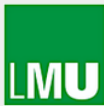 <p>LUDWIG-<br/>MAXIMILIANS-<br/>UNIVERSITÄT<br/>MÜNCHEN</p> <p>4% ausgefüllt</p> | <h3>Datenschutzerklärung</h3> <p>Die erhobenen Daten werden ausschließlich für wissenschaftliche Zwecke verwendet und nicht an Dritte weiter gegeben. Ein Personenbezug kann anhand der erhobenen Daten nicht hergestellt werden. Es werden somit ausschließlich anonyme, nicht personenbezogene Daten gespeichert und verarbeitet. Es sind keine Rückschlüsse auf Studienteilnehmer*innen möglich. Die Ergebnisse dieser Studie können im Rahmen von Lehr- und Forschungszwecken veröffentlicht werden. Dies geschieht in anonymisierter Form.</p> <p><b>Ihre Rechte:</b><br/>Die Teilnahme an dieser Studie erfolgt freiwillig. Sie können die Umfrage jederzeit ohne Angabe von Gründen abbrechen.</p> <p><b>Einverständniserklärung:</b><br/>Durch das Klicken auf „Weiter“ bestätigen Sie, dass Sie alle oben stehenden Informationen gelesen und verstanden haben. Sie erklären sich mit der Teilnahme an dieser Studie und mit der Analyse der Daten einverstanden.</p> <p>Vielen Dank für Ihr Interesse und Ihre Zeit!</p> <p style="text-align: right;"><a href="#">Zurück</a> <a href="#">Weiter</a></p> <p style="text-align: right;">Lilly Baum – 2021</p> |
|----------------------------------------------------------------------------------------------------------------------------------------------------------------------|------------------------------------------------------------------------------------------------------------------------------------------------------------------------------------------------------------------------------------------------------------------------------------------------------------------------------------------------------------------------------------------------------------------------------------------------------------------------------------------------------------------------------------------------------------------------------------------------------------------------------------------------------------------------------------------------------------------------------------------------------------------------------------------------------------------------------------------------------------------------------------------------------------------------------------------------------------------------------------------------------------------------------------------------------------------------------------------------------------------------------------------------------------------------|

### English translation:

Privacy policy

The data collected will be used exclusively for scientific purposes and will not be passed on to third parties. No personal reference can be made on the basis of the data collected. Therefore, only anonymous, non-personal data is stored and processed. It is not possible to draw conclusions about study participants. The results of this study may be published for teaching and research purposes. This is done in anonymized form.

Your rights:

Participation in this study is voluntary. You can cancel the survey at any time without giving reasons.

Declaration of consent:

By clicking on "Continue", you confirm that you have read and understood all the information above. You agree to participate in this study and to the analysis of the data.

Thank you for your interest and your time!

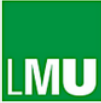

LUDWIG-  
MAXIMILIANS-  
UNIVERSITÄT  
MÜNCHEN

8% ausgefüllt

**1. Wie viele Hunde leben in Ihrem Haushalt?**  
☐ 1 Hund  
☐ 2 Hunde  
☐ mehr als 3 Hunde  
☐ keine Hunde

**2. Rasse Ihres Hundes**  
Bitte sehen Sie es mir nach, dass hier nicht alle Rasse aufgeführt werden konnten.  
Wenn Sie Ihre Rasse nicht finden, können Sie diese gerne unter Andere ergänzen.

**3. Welches Geschlecht hat Ihr Tier?**  
**Mein Tier ist,...**  
☐ weiblich  
☐ weiblich kastriert  
☐ männlich  
☐ männlich kastriert

**4. Alter Ihres Hundes:**  
Bitte geben Sie nur ganze Jahre an.  
**Alter:**  
 Jahre

**5. Körperhöhe Ihres Hundes:**  
**Die Körperhöhe meines Hundes liegt zwischen:**  
☐ <40cm  
☐ 41-60cm  
☐ 61-70cm  
☐ >70cm

Zurück

Weiter

Lilly Baum - 2021

**English translation:**

1. how many dogs live in your household?

If you have several dogs, please choose one of them as the basis for the following questions.

1 dog

2 dogs

3 or more dogs

2. breed of your dog

Please forgive me for not being able to list all breeds here.

If you cannot find your breed, you are welcome to add it under Other.

Selection: \_\_\_\_\_

For multi-dog households: from here on, please fill in all questions for the one dog you have selected.

3. what sex is your pet?

My animal is:

Female

Female neutered

Male

Male neutered

4. age of your dog:

Please enter whole years only.

Age: \_\_\_\_ Years

5. height of your dog:

Measured at the dog's shoulder height

My dog's body height is between:

<40cm

41-60cm

61-70cm

>70cm

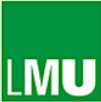

LUDWIG-  
MAXIMILIANS-  
UNIVERSITÄT  
MÜNCHEN

12% ausgefüllt

**6. Gewicht Ihres Hundes:**  
Bitte geben Sie das aktuelle Gewicht Ihres Hundes an.

**Das Gewicht meines Hundes beträgt:**  
 kg

**7. Kontrollieren Sie das Gewicht Ihres Hundes regelmäßig?**  
☐ ja, 1x im Jahr  
☐ ja, 1x im Monat  
☐ ja, 1x die Woche  
☐ nein

Zurück

Weiter

Lilly Baum – 2021

**English translation:**

6. weight of your dog:

Please enter the current weight of your dog.

The weight of my dog is: \_\_\_\_ kg

7. do you check your dog's weight regularly?

Yes, approx. once a year

Yes, approx. 1x every six months

Yes, approx. 1x a month

Yes, approx. 1x a week

No

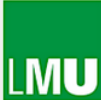

LUDWIG-  
MAXIMILIANS-  
UNIVERSITÄT  
MÜNCHEN

16% ausgefüllt

8. Wie ist Ihr Hund geimpft?

a) Grundimmunisierung  
Grundimmunisierungs Impfungen sind die Impfungen die im 1.-2. Lebensmonat in regelmäßigen Abständen wiederholt werden müssen. (meist 3-4 Impfungen im Abstand von 4 Wochen)

Mein Hund bekam die Grundimmunisierung gegen:

☐ Parvovirose  
☐ Staupe  
☐ Leptospirose  
☐ Tollwut  
☐ HCC (Hepatitis contagiosa canis)  
☐ keine

9. Wie ist Ihr Hund geimpft?

b) Wiederholungsimpfungen  
Wiederholungs Impfungen sind die Impfungen die in jährlichen bis dreijährlichen Abständen (je nach Impfstoff) immer wieder aufgefrischt werden müssen.

Mein Hund bekommt regelmäßig die Wiederholungsimpfung gegen:

☐ Parvovirose  
☐ Staupe  
☐ Leptospirose  
☐ Tollwut  
☐ HCC (Hepatitis contagiosa canis)  
☐ keine

Zurück

Weiter

Lilly Baum – 2021

### English translation:

8. how is your dog vaccinated?

a) Basic immunization

Basic immunization vaccinations are the vaccinations that must be repeated at regular intervals during the first months of life. (usually 3-4 vaccinations at intervals of 4 weeks)

My dog received the basic immunization against:

Parvovirus

distemper

leptospirosis

rabies

HCC (Hepatitis contagiosa canis)

Other diseases

None

I do not know

9. how is your dog vaccinated?

b) Revaccinations

Booster vaccinations are vaccinations that have to be repeated at annual to triennial intervals (depending on the vaccine).

My dog is regularly vaccinated against:

parvovirosis

distemper

leptospirosis

rabies

HCC (Hepatitis contagiosa canis)

Other diseases

None

I do not know

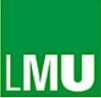

LUDWIG-  
MAXIMILIANS-  
UNIVERSITÄT  
MÜNCHEN

20% ausgefüllt

10. Entwurmen Sie Ihren Hund regelmäßig?

☐ ja, alle 4 Wochen

☐ ja, alle 2 Monate

☐ ja, 2x im Jahr

☐ ja, 1x im Jahr

☐ unregelmäßig

☐ nein

Zurück

Weiter

Lilly Baum – 2021

**English translation:**

10. do you deworm your dog regularly?

Yes, approx. every 4 weeks

Yes, approx. 4 times a year

Yes, approx. once a year

Only after a positive fecal sample

Irregularly

No

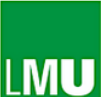

LUDWIG-  
MAXIMILIANS-  
UNIVERSITÄT  
MÜNCHEN

24% ausgefüllt

11. Gehen Sie mit Ihrem Hund regelmäßig zur tierärztlichen Gesundheitsvorsorge?

☐ Ja, alle 2 Jahre

☐ Ja, 1x im Jahr

☐ Ja, 2x im Jahr

☐ Nein

☐ Andere

Zurück

Weiter

Lilly Baum – 2021

**English translation:**

11. do you take your dog for regular veterinary check-ups?

Yes, every 2 years

Yes, once a year

Yes, twice a year

Yes, more than twice a year

No

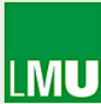

LUDWIG-  
MAXIMILIANS-  
UNIVERSITÄT  
MÜNCHEN

28% ausgefüllt

**12. Wann wurde das letzte mal ein Blutbild von Ihrem Hund gemacht?**

- ☐ vor einer Woche
- ☐ vor einem Monat
- ☐ vor einem Jahr
- ☐ länger als vor einem Jahr
- ☐ noch nie

**13. Gab es Auffälligkeiten im Blutbild Ihres Hundes?**

- ☐ erhöhte Leberwerte
- ☐ erhöhte Nierenwerte
- ☐ erhöhte Bauchspeicheldrüsenwerte
- ☐ erhöhte Schilddrüsenwerte
- ☐ verringerte Schilddrüsenwerte
- ☐ erhöhter Blutglukosespiegel
- ☐ verringerter Blutglukosespiegel
- ☐ erhöhter Natriumwert
- ☐ verringerter Natriumwert
- ☐ erhöhter Kaliumwert
- ☐ verringerter Kaliumwert
- ☐ erhöhter Calciumwert
- ☐ verringerter Calciumwert
- ☐ erhöhter Chloridwert
- ☐ verringerter Chloridwert
- ☐ erhöhter VitaminA Spiegel
- ☐ verringerter VitaminA Spiegel
- ☐ erhöhter VitaminD Spiegel
- ☐ verringerter VitaminD Spiegel
- ☐ Andere Veränderungen
- ☐ keine Veränderungen

Zurück

Weiter

Lilly Baum – 2021

**English translation:**

12. when was the last time your dog had blood work done?

One week ago

One month ago

One year ago

Longer than a year ago

Never

13. were there any abnormalities in your dog's blood count?

Elevated liver values

Elevated kidney values

Increased pancreas values

Reduced pancreas values

Increased thyroid levels

reduced thyroid levels

increased blood glucose level

decreased blood glucose level

increased sodium level

decreased sodium level

increased potassium level  
decreased potassium level  
increased calcium level  
decreased calcium value  
increased chloride value  
decreased chloride level  
increased vitamin A level  
decreased vitamin A level  
increased vitamin D level  
decreased vitamin D level  
other changes  
no changes

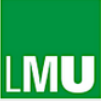

LUDWIG-MAXIMILIANS-UNIVERSITÄT MÜNCHEN

32% ausgefüllt

**14. Hat Ihr Hund bestehende Erkrankungen?**

☐ Nieren Erkrankung

☐ Erkrankung des Harnapparates (z.B. Blasensteine)

☐ Leber Erkrankung

☐ Herz Erkrankung

☐ Magen-Darm-Erkrankung

☐ Futtermittelallergien

☐ Schilddrüsen Erkrankung

☐ Andere Stoffwechsel Erkrankung (z.B. Diabetes mellitus)

☐ Haut Erkrankung

☐ Orthopädische Erkrankung

☐ Andere

☐ Keine

Zurück

Weiter

Lilly Baum – 2021

**English translation:**

14. does your dog have any existing illnesses?

Kidney disease

Disease of the urinary system (e.g. bladder stones)

Liver disease

Heart disease

Gastrointestinal disease

Feed allergies

Thyroid disease

Other metabolic disease (e.g. diabetes mellitus)

Skin disease

Orthopaedic disease

Other diseases

None

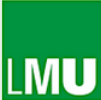

LUDWIG-  
MAXIMILIANS-  
UNIVERSITÄT  
MÜNCHEN

36% ausgefüllt

15. Um welche Art der Erkrankung handelt es sich?  
Nennen Sie bitte die Krankheit Ihres Hundes

16. Wann wurde die Erkrankung erstmals diagnostiziert?

☐ Trat vor Beginn des BARFens auf

☐ Trat während des BARFens auf

☐ Trat nach Beendigung des BARFens auf

Zurück

Weiter

Lilly Baum – 2021

#### English translation:

15. What type of illness is it?

In the previous question, you indicated that your dog suffers from one or more illnesses.  
Please name the disease(s) your dog suffers from.

16. when was the disease first diagnosed?

Occurred before the start of BARF

Occurred during BARF feeding

Occurred after the end of BARF

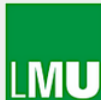

LUDWIG-  
MAXIMILIANS-  
UNIVERSITÄT  
MÜNCHEN

40% ausgefüllt

17. Aus welchem Grund haben Sie sich damals für das BARFen entschieden?

☐ Wunsch nach natürlicher, artgerechter Fütterung

☐ kein Vertrauen in die Futtermittelindustrie

☐ Kenntniss über die Zusammensetzung und die Zutaten einer Ration

☐ Zahngesundheit verbessern

☐ Fresszeiten verlängern

☐ Krankheit

☐ Andere

Zurück

Weiter

Lilly Baum – 2021

#### English translation:

17. Why did you decide to start barfing back then?

Desire for natural, species-appropriate feeding

No trust in the animal feed industry

Knowledge of the composition and ingredients of a ration

To improve dental health

Extend feeding times

Illness

Other

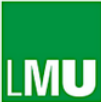

LUDWIG-  
MAXIMILIANS-  
UNIVERSITÄT  
MÜNCHEN

44% ausgefüllt

18. Wo haben Sie Ihr BARF-Futter hauptsächlich gekauft?  
bei einem:

☐ Internethandel

☐ Tierfutterfachgeschäft

☐ Schlachthof

☐ Metzger

☐ Supermarkt

Zurück Weiter

Lilly Baum – 2021

**English translation:**

18. where did you mainly buy your barf food?

from a:

Internet shop

Specialist pet food shop

Abattoir

butcher

supermarket

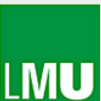

LUDWIG-  
MAXIMILIANS-  
UNIVERSITÄT  
MÜNCHEN

48% ausgefüllt

19. In welcher Form haben Sie das BARF Fleisch hauptsächlich gekauft?

☐ Frisch

☐ Gefroren

☐ Getrocknet

Zurück Weiter

Lilly Baum – 2021

**English translation:**

19. in what form did you mainly buy the barf meat?

Fresh

Frozen

Dried

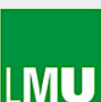

LUDWIG-  
MAXIMILIANS-  
UNIVERSITÄT  
MÜNCHEN

52% ausgefüllt

20. In welcher Form haben Sie Ihr BARF Futter hauptsächlich gekauft?

☐ im ganzen Stück

☐ gewolft

Zurück Weiter

Lilly Baum – 2021

**English translation:**

20. in what form did you mainly buy your barf food?

In whole pieces

Ground

Other

|                                                                                                                                                                     |                                                                      |        |
|---------------------------------------------------------------------------------------------------------------------------------------------------------------------|----------------------------------------------------------------------|--------|
| 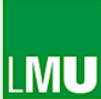 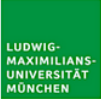 | <b>21. Welche Form trifft auf Ihre BARF Fütterung am ehesten zu?</b> |        |
|                                                                                                                                                                     | <input type="radio"/> Komplettm Menü (Fleisch und Gemüse)            |        |
|                                                                                                                                                                     | <input type="radio"/> Komplettm Menü (nur Fleisch)                   |        |
|                                                                                                                                                                     | <input type="radio"/> selbst zusammengestellte Ration                |        |
| 56% ausgefüllt                                                                                                                                                      | Zurück                                                               | Weiter |
| Lilly Baum – 2021                                                                                                                                                   |                                                                      |        |

**English translation:**

21. Which form is most suitable for your barf feeding?

Complete menu (meat and vegetables)

Complete menu (meat only)

Self-composed ration

|                                                                                                                                                                     |                                                                                                                              |        |
|---------------------------------------------------------------------------------------------------------------------------------------------------------------------|------------------------------------------------------------------------------------------------------------------------------|--------|
| 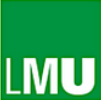 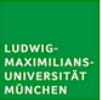 | <b>22. Haben Sie hauptsächlich Voll- oder Teilbarf Rationen verfüttert?</b>                                                  |        |
|                                                                                                                                                                     | Vollbarf = keine Zugabe von Getreide<br>Teilbarf = Fütterung von zusätzlichen Kohlenhydraten wie z.B. Nudeln oder Kartoffeln |        |
|                                                                                                                                                                     | <input type="radio"/> Vollbarf Rationen                                                                                      |        |
|                                                                                                                                                                     | <input type="radio"/> Teilbarf Rationen                                                                                      |        |
| 60% ausgefüllt                                                                                                                                                      | <b>23. Richteten Sie sich hauptsächlich nach einer bestimmten BARF Richtung?</b>                                             |        |
|                                                                                                                                                                     | <input type="radio"/> ja, BARF nach: <input type="text"/>                                                                    |        |
|                                                                                                                                                                     | <input type="radio"/> nein                                                                                                   |        |
|                                                                                                                                                                     | Zurück                                                                                                                       | Weiter |
| Lilly Baum – 2021                                                                                                                                                   |                                                                                                                              |        |

**English translation:**

22. did you mainly feed full-barf or part-barf rations?

Full-barf = no addition of carbohydrates

Partial BARF = feeding of additional carbohydrates such as pasta or potatoes

Full-barf rations

Partial-barf rations

23. do you mainly follow a particular BARF diet?

Yes, BARF according to:

No

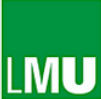

LUDWIG-  
MAXIMILIANS-  
UNIVERSITÄT  
MÜNCHEN

65% ausgefüllt

24. Welche Zutaten waren in Ihrem täglichen BARF Futter enthalten?

☐ Fleisch

☐ Fisch

☐ Innereien

☐ Knochen

☐ Gemüse

☐ Nudeln, Kartoffeln oder Reis

☐ Obst

☐ Milchprodukte

☐ Eier

☐ Öl

25. Aus wie vielen Zutaten bestand Ihre Tages BARF Ration im Schnitt?

Zutaten

Zurück

Weiter

Lilly Baum – 2021

### English translation:

24. Which ingredients were contained on average in your daily barf food?

Meat

fish

offal

Bones

vegetables

Pasta, rice

Potatoes

fruit

Dairy products

eggs

oil

Vitamin and mineral mixtures

Others

I do not know

25. how many ingredients did your daily barf ration consist of on average?

\_\_ Ingredients

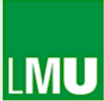

LUDWIG-MAXIMILIANS-UNIVERSITÄT MÜNCHEN

66% ausgefüllt

### 26. Fütterten Sie zusätzlich Vitamin- und Mineralstoffgemische?

**Ja, Zusätze der Art:**

- ☐ Seealgenmehl
- ☐ Eierschalenmehl
- ☐ Knochenmehl
- ☐ Blutmehl
- ☐ Calcium Pulver
- ☐ Grünlippmuschel Pulver
- ☐ Bierhefe
- ☐ Vom einem/er Tierarzt/ärztin zusammengestelltes Vitamin-Mineralstoff Pulver
- ☐ Kommerzielles Vitamin-Mineralstoff Pulver, der Marke:
- ☐ Andere
- ☐ Keine

Zurück
Weiter

BarfStudie2021

**English translation:**

26. did you feed additional vitamin and mineral mixtures?

Yes, supplements of the type

Seaweed meal

Eggshell meal

Bone meal

Blood meal

Calcium powder

Green-lipped mussel powder

Brewer's yeast

Vitamin-mineral powder formulated by a veterinarian

Commercial vitamin-mineral powder, of the brand:

Other

None

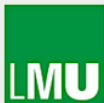

LUDWIG-MAXIMILIANS-UNIVERSITÄT MÜNCHEN

69% ausgefüllt

Als wie aufwendig empfanden Sie das Zubereiten der BARF Rationen? gar nicht aufwendig ☐ ☐ ☐ ☐ ☐ extrem aufwendig

Ließ sich die Fütterung gut in Ihren Alltag integrieren? ohne Probleme ☐ ☐ ☐ ☐ ☐ sehr umständlich

Zurück
Weiter

Lilly Baum – 2021

**English translation:**

How time-consuming did you find preparing the barf rations?

not time-consuming at all x x x x extremely time-consuming

Was the feeding easy to integrate into your daily routine?

without any problems x x x x very complicated

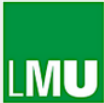

LUDWIG-  
MAXIMILIANS-  
UNIVERSITÄT  
MÜNCHEN

74% ausgefüllt

**26. Wann haben Sie mit dem BARFen aufgehört und wie alt war Ihr Hund zu diesem Zeitpunkt?**

**Wann haben Sie aufgehört? Vor...**  
 Jahren

**Wie alt war Ihr Hund?**  
 Jahre alt

**27. Wie lange haben Sie insgesamt geBARFt?**

Jahre

Zurück

Weiter

Lilly Baum – 2021

**English translation:**

26. When did you stop barfing and how old was your dog at that time?

When did you stop? Years ago:

\_\_\_ years ago

How old was your dog at that time?

\_\_\_ years old

27. how long did you feed your dog in total?

\_\_\_ years

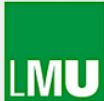

LUDWIG-  
MAXIMILIANS-  
UNIVERSITÄT  
MÜNCHEN

78% ausgefüllt

**28. Auf welche Futterart sind Sie nach dem BARFen hauptsächlich umgestiegen?**

☐ Trockenfutter

☐ Feuchtfutter

☐ selbst gekochte Rationen

☐ Andere

**29. Auf welche Futtersorte sind Sie nach dem BARFen umgestiegen?**

☐ Junior-Futter

☐ Adult-Futter

☐ Senior-Futter

☐ Rasse-Futter

☐ An-/Hypoallergenic Diät

☐ Gewichtskontrolle Diät

☐ Gastrointestinal Diät

☐ Harn-/Blasenstein Diät

☐ Nieren Diät

☐ Leber Diät

☐ Herz Diät

☐ Pankreas (Bauchspeicheldrüse) Diät

☐ Diabetes Diät

☐ Mobility Diät

☐ Andere

Zurück

Weiter

Lilly Baum – 2021

**English translation:**

28. what type of food did you mainly switch to after barfing?

dry food

Moist food

Home-cooked rations

Other \_\_\_\_

29. which type of food did you switch to after barfing?

Junior food

Adult food

Senior food

Breed food

An-/hypoallergenic diet

Weight control diet

Gastrointestinal diet

Urinary/bladder stone diet

Kidney diet

Liver Diet

Heart diet

Pancreas (pancreas) diet

Diabetes diet

Mobility diet

Other diets

### 30. Was war für Sie der Hauptgrund mit dem BARFen aufzuhören?

- ☐ Rationen wurden nicht gut vertragen (z.B. Flatulenzen, Durchfall, Verstopfungen)
- ☐ Rationen wurden nicht gern gefressen
- ☐ Krankheit des Hundes
- ☐ Umstellung auf ein spezielles Diät Futter (z.B.: Nierendiät, Herzdiät)
- ☐ Fellprobleme
- ☐ Gewichtszunahme
- ☐ Gewichtsabnahme
- ☐ Weniger Zeit zur Verfügung als zu Beginn
- ☐ Auf Dauer zu aufwendig geworden
- ☐ Zu teuer
- ☐ Umstellung auf ein vegetarisches/veganes Futter
- ☐ Angst vor Infektionen bei Neugeborenen oder Schwangeren
- ☐ Anderer:

### 31. Welche Gründe spielten neben dem Hauptgrund zusätzlich eine Rolle um mit dem BARFen aufzuhören?

- ☐ Rationen wurden nicht gut vertragen (z.B. Flatulenzen, Durchfall, Verstopfung)
- ☐ Rationen wurden nicht gern gefressen
- ☐ Krankheit des Hundes
- ☐ Umstellung auf ein spezielles Diät Futter (z.B.: Nierendiät, Herzdiät)
- ☐ Fellprobleme
- ☐ Gewichtszunahme
- ☐ Gewichtsabnahme
- ☐ Weniger Zeit zur Verfügung als zu Beginn
- ☐ Auf Dauer zu aufwendig geworden
- ☐ Zu teuer
- ☐ Umstellung auf ein vegetarisches/veganes Futter
- ☐ Angst vor Infektionen bei Neugeborenen oder Schwangeren
- ☐ Andere:

Zurück

Weiter

Lilly Baum – 2021

#### English translation:

30. What was the main reason for you to stop barfing?

Rations were not well tolerated (e.g. flatulence, diarrhea, constipation)

Rations were not eaten with pleasure (lack of acceptance)

Illness of the dog

Change to a special diet food (e.g. kidney diet, heart diet)

Coat problems

Weight gain

Weight loss

Less time available than at the beginning

Becomes too costly in the long run

Too expensive

Switching to a vegetarian/vegan diet

Fear of infection with newborns or pregnant women in the household

Other:

31. Which reasons played a role in addition to the main reason to stop barfing?

Rations were not well tolerated (e.g. flatulence, diarrhea, constipation)

Rations were not eaten with pleasure (lack of acceptance)

Illness of the dog

Change to a special diet food (e.g. kidney diet, heart diet)

Coat problems  
 Weight gain  
 Weight loss  
 Less time available than at the beginning  
 Becomes too costly in the long run  
 Too expensive  
 Switching to a vegetarian/vegan diet  
 Fear of infection with newborns or pregnant women in the household  
 Others:

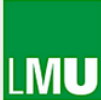

LUDWIG-MAXIMILIANS-UNIVERSITÄT MÜNCHEN

87% ausgefüllt

**32. Wie zeigte sich das die Rationen nicht gut vertragen wurden?**  
 Beispiele: Durchfall, Verstopfung, Blähungen, Erbrechen, etc.

Zurück

Weiter

Lilly Baum – 2021

**English translation:**

32. how was it shown that the rations were not well tolerated?  
 Examples: Diarrhea, constipation, flatulence, vomiting, etc.

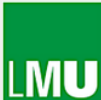

LUDWIG-MAXIMILIANS-UNIVERSITÄT MÜNCHEN

91% ausgefüllt

**33. Welche Krankheit war ursächlich für das Beenden der BARF Fütterung?**

☐ Nieren Erkrankung  
☐ Erkrankung des Harnapparates (z.B. Blasensteine)  
☐ Leber Erkrankung  
☐ Herz Erkrankung  
☐ Magen-Darm-Erkrankung  
☐ Schilddrüsen Erkrankung  
☐ Andere Stoffwechsel Erkrankung (z.B. Diabetes mellitus)  
☐ Futtermittelallergie  
☐ Haut Erkrankungen  
☐ Zahnprobleme  
☐ Orthopädische Erkrankung  
☐ Andere

**34. Um welche Art der Erkrankung handelt es sich?**  
 Nennen Sie die Erkrankung Ihres Hundes:

Zurück

Weiter

Lilly Baum – 2021

**English translation:**

33. which illness was the reason for stopping barf feeding?  
 Kidney disease  
 Disease of the urinary system (e.g. bladder stones)  
 Liver disease  
 Heart disease  
 Gastrointestinal disease  
 Thyroid disease

Other metabolic disease (e.g. diabetic mellitus)

Feed allergy

Skin diseases

Dental problems

Orthopaedic disease

Other

34 What type of disease is it?

Name your dog's illness:

|                                                                                                                                                   |                                                                                                                                                                                                                                                                                                                                                                                                                                                                                                                        |
|---------------------------------------------------------------------------------------------------------------------------------------------------|------------------------------------------------------------------------------------------------------------------------------------------------------------------------------------------------------------------------------------------------------------------------------------------------------------------------------------------------------------------------------------------------------------------------------------------------------------------------------------------------------------------------|
| 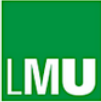<br>LUDWIG-MAXIMILIANS-UNIVERSITÄT MÜNCHEN<br><br>95% ausgefüllt | <b>35. Welches spezielle Diät Futter bekommt Ihr Hund jetzt?</b>                                                                                                                                                                                                                                                                                                                                                                                                                                                       |
|                                                                                                                                                   | <p><input type="radio"/> Nieren-Diät</p> <p><input type="radio"/> Harnstein-Diät</p> <p><input type="radio"/> Leber-Diät</p> <p><input type="radio"/> Herz-Diät</p> <p><input type="radio"/> Bauchspeicheldrüsen-Diät</p> <p><input type="radio"/> An-/Hypoallergene-Diät</p> <p><input type="radio"/> Magen-Darm-Diät</p> <p><input type="radio"/> Adipositas-Diät</p> <p><input type="radio"/> Diabetes Diät</p> <p><input type="radio"/> Mobility Diät</p> <p><input type="radio"/> Andere <input type="text"/></p> |
|                                                                                                                                                   | <p><input type="button" value="Zurück"/> <input type="button" value="Weiter"/></p> <p>Lilly Baum – 2021</p>                                                                                                                                                                                                                                                                                                                                                                                                            |

**English translation:**

35. What special diet food is your dog on now?

Kidney diet

Urinary stone diet

Liver diet

Heart diet

Pancreas diet

Anti-/hypoallergenic diet

Gastrointestinal diet

Obesity diet

Diabetes diet

Mobility diet

Other diets

|                                                                                                                               |                                                                                                                                                          |
|-------------------------------------------------------------------------------------------------------------------------------|----------------------------------------------------------------------------------------------------------------------------------------------------------|
| 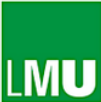<br>LUDWIG-MAXIMILIANS-UNIVERSITÄT MÜNCHEN | <b>Vielen Dank für Ihre Teilnahme!</b>                                                                                                                   |
|                                                                                                                               | <p>Wir möchten uns ganz herzlich für Ihre Mithilfe bedanken.</p> <p>Ihre Antworten wurden gespeichert, Sie können das Browser-Fenster nun schließen.</p> |
|                                                                                                                               | <p>Lilly Baum – 2021</p>                                                                                                                                 |

**English translation:**

Thank you for your participation!

We would like to thank you very much for your help.

If you have any questions or suggestions about our study, please contact me by e-mail at [BarfStudie2021@web.de](mailto:BarfStudie2021@web.de)  
Your answers have been saved, you can now close the browser window.
